# Supplementary material
Source: publisher figshare collection journal article supplement (https://frontiersin.figshare.com/ndownloader/files/21957885)
Supplement: Supplementary file [file 21957885]

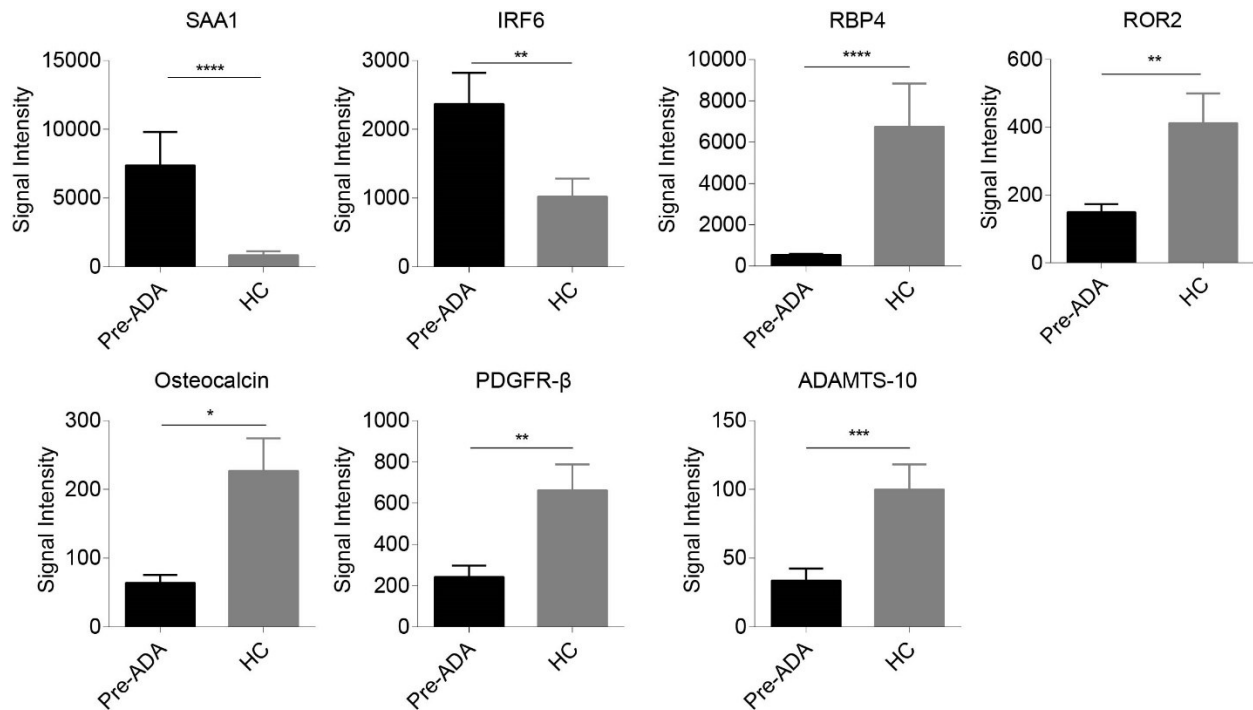

**Figure S1** Relative expression levels in seven pivotal DEPs between HCs and 16 AS patients pre-treated with ADA in the discovery cohort. Two proteins (SAA1 and IRF6) were expressed higher, and five proteins (RBP4, ROR2, osteocalcin, PDGFR-β, and ADAMTS-10) were expressed lower in the AS group. Data were presented as box and whisker plots (mean ± SEM). \**P* value < 0.05, \*\**P* value < 0.01, \*\*\**P* value < 0.001, \*\*\*\**P* value < 0.0001. DEP, differentially expressed protein; HC, healthy control; AS, ankylosing spondylitis; ADA, adalimumab; Pre-ADA, pre-treated with ADA.
